# Supplementary material for: Multidrug-resistant Mycobacterium tuberculosis: a report of cosmopolitan microbial migration and an analysis of best management practices
Source: PubMed Central journal article supplement (PMC7499973; doi:10.1186/s12879-020-05381-0), 2020-09-17
Supplement: 12879_2020_5381_MOESM1_ESM.pdf [file 12879_2020_5381_MOESM1_ESM.pdf]

## **Introductory questions**

Name:

Sex:

Date and place of birth:

Nationality:

Please tell us which country and town did you leave to come to Germany and when was that?

## **Open questions:**

### **Migration route to Germany:**

Please explain how you arrived to Germany/what migration route to Germany you took

**Prompts:** means of transportation, countries transited, countries and cities you resided on your way to Germany, accommodation, crossed borders, persons travelling together

### **Displacement within Germany**

Please explain where you lived so far in Germany

**Prompts:** places you lived in and for how long, types of accommodation, persons you shared accommodation with

### **Medical screening upon arriving to Germany**

Do you remember whether you received a medical examination upon entering Germany and, if so, what it entailed?

**Prompts:** physical examination, X-ray, blood samples

### **Knowledge about tuberculosis before migrating**

Do you know what tuberculosis is and-if so-have you or any persons in your environment ever had tuberculosis?

**Prompts:** long-term TB antibiotic intake, cough, fever, loss-of-weight before leaving the country of birth, contact to sick persons before leaving the country of birth

### **First TB symptoms and time-to-diagnosis**

Please explain when you or your child started feeling ill, what symptoms you experienced and what doctors you saw until the diagnosis of TB

**Prompts:** fever, cough, loss of appetite, weight loss, medical consultations (MD, date of consultation) and consequence thereof, prescribed medications prior to the diagnosis of TB

## **Contact tracing**

Have you had contact to ill persons on your route to Germany or in Germany?

With whom have you been in contact since starting feeling ill?

**Prompts:** time and type of contact, symptoms the contacts experienced, treatments the contacts might have received
