# Supplementary material for: Multidrug-resistant Mycobacterium tuberculosis: a report of cosmopolitan microbial migration and an analysis of best management practices
Source: PubMed Central journal article supplement (PMC7499973; doi:10.1186/s12879-020-05381-0), 2020-09-17
Supplement: 12879_2020_5381_MOESM2_ESM.pdf [file 12879_2020_5381_MOESM2_ESM.pdf]

VectorStock.com  
sales@vectorstock.com

Licensed to - Oana Joean

|                                                                                  | <b>ID</b>        | <b>NAME</b>                                     |             |  |
|----------------------------------------------------------------------------------|------------------|-------------------------------------------------|-------------|--|
|  | 21681944         | Contour world map black and white colors vector |             |  |
|  | <b>LICENSE</b>   | <b>PRICE</b>                                    | <b>DATE</b> |  |
|                                                                                  | Expanded License | 0 Credit                                        | May 6, 2020 |  |

[View - EULA Standard](#) | [EULA Editorial](#) | [EULA Expanded](#)

**Re: Expanded License VectorStock**

VectorStock Administration [admin@vectorstock.com]

**Gesendet:** Mittwoch, 6. Mai 2020 22:35**An:** Joean, Oana Dr.

Dear Oana,

Yes you can use our images in this way with the Expanded License,

Best Regards / Admin Team

**VectorStock**<sup>®</sup>WATCH  TWEET  PIN  SHARE 

---

**WWW.VECTORSTOCK.COM \ THE WORLDS PREMIER ONLINE VECTOR IMAGE AGENCY**

---

VECTORSTOCK MEDIA LIMITED \ PO BOX 68647 \ NEWTON \ AUCKLAND \ NEW ZEALAND 1145 \

CAUTION : this electronic e-mail message and any attached files contain information intended for exclusive use of the individual or entity to whom it is addressed and it may contain information that is proprietary, privileged, confidential and/or exempt from disclosure under international law. If you are not the intended recipient, you are hereby notified that any viewing, copying, disclosure or distribution of this information may be subject to legal restriction or sanction. Please notify the sender, by electronic mail of any unintended recipients and delete the original message without making any copies. The views or information expressed in this message are those of the author and may not be those of Vectorstock Media Limited, the directors or the website **www.vectorstock.com**

On 7/05/2020, at 7:33 AM, <[Joean.Oana@mh-hannover.de](mailto:Joean.Oana@mh-hannover.de)> <[Joean.Oana@mh-hannover.de](mailto:Joean.Oana@mh-hannover.de)> wrote:

Good evening!

I recently purchased a vector image with an extended license from VectorStock. Am I allowed to publish parts of this image in a non-vectorial form for a scientific paper under a CC BY open access license?

Best regards,  
Oana Joean

Search...

All Vectors

Free Vectors

Categories

Buy Images

Account

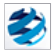

USER  
Oana

Credits 30 CR

My Purchases

Account

History

Transactions

COLLECTIONS

Cart 0

Galleries 0

Likes 0

Following Artists 0

Log Out

FAQ

## Frequently Asked Questions

Members Artists

### VectorStock

What is VectorStock®?

VectorStock® Website Terms of Use

What can I use VectorStock® content for?

About Us

Contact Us

VectorStock® disclaimer

VectorStock® Take Down Policy

### Vectors

### Licensing

Why are the files at such a low cost?

License Types - Standard

[License Types - Expanded](#)

I need to upgrade a file to an Expanded License

Free Vector usage with image Credit/Attribution

VectorStock® Membership and Content License Agreement

Free Vector License

### Pay-per-Image

### Credits

### Subscriptions

### Vector Customization Service

### Account

### License Types - Expanded

#### Expanded License EULA

1. VectorStock® grants you a Multi-seat, non-exclusive, non-transferable, license to use and reproduce vectors in the following ways, in addition to and including all Standard License applications.

- a. You may use the content on items (digital or hard copy) for resale such as t-shirts and fabric prints, flags, postcards, stickers, posters, coffee mugs, calendars or the like. Digital reproduction in non Vector formats (jpg, gif, bmp) on websites such as Cafepress or Digital Scrapbooking kits. You may use the content in commercial software applications or GUI design for resale with no limitations regarding the number of copies or print run.

- b. You may use the Image in website templates, document templates, wallpapers, screensavers, e-cards or similar products for resale with no limitations regarding the number of copies.

All other restrictions from the "not permitted" section from the standard license still apply.

- c. All license agreements prohibit the resale or re distribution of any part or element of the content as a vector, or in any format that will allow a third party access to the file in digital vector format i.e EPS, Ai, Flash, SVG and the like.

For example the content can not be resold or distributed in a Flash template unless the flash elements have been converted to a non-vector format.

The EULA Standard or Expanded does not permit the use of any part of any purchased VectorStock® content on a competing website or business in any media format, or in any situation that may be regarded as a conflict of interest between VectorStock® and the end user and or their use of our content.

Your Multi-seat license gives you the option to share the vector(s) with other people within your organization or company, not limited by the number of users within your organization or company. You warrant that you will do your best to prevent third parties from duplicating the content.

**Note:** This license may be updated from time to time to include relevant new and future media usage/applications. This agreement is retrospective and supersedes any previous versions or modifications. All users will be notified of major changes via email.

VectorStock

Vector Images

Popular Categories

Social

Contact

102,152 Vectors Just Added

Background & Textures

twitter.com/vectorstock

FAQ

342,279 Free Vectors

Design elements

facebook.com/vectorstock

Become a Contributor

Most Popular Vectors

Icons & Emblems (sets)

pinterest.com/vectorstock

Affiliate

Buy Vector Art & Graphics

Floral & Decorative

youtube.com/vectorstock

What is a Vector?

Borders & Frames

VectorStock Terms & Conditions

VECTORSTOCK and the VectorStock logo are registered trademarks of VectorStock Media. Copyright © 2020. All Rights Reserved.
